# Supplementary material for: Discovery of plasma messenger RNA as novel biomarker for gastric cancer identified through bioinformatics analysis and clinical validation
Source: PeerJ. 2019 Jun 18;7:e7025. doi: 10.7717/peerj.7025 (PMC6587939; doi:10.7717/peerj.7025)
Supplement: Dataset S1 [file peerj-07-7025-s002.xlsx]

## Sheet: COL6A3
Sample Name	Target Name	Reporter	Ct Mean		Sample Name	Target Name	Reporter	Ct Mean
N2	COL6A3	SYBR	33.4891		N2	GAPDH	SYBR	34.1196
N3	COL6A3	SYBR	36.8068		N3	GAPDH	SYBR	33.5692
N4	COL6A3	SYBR	33.0629		N4	GAPDH	SYBR	33.5563
N5	COL6A3	SYBR	35.5894		N5	GAPDH	SYBR	34.2836
CD N1	COL6A3	SYBR	35.1415		CD N1	GAPDH	SYBR	30.7737																		Y	N	N	N
CD N4	COL6A3	SYBR	37.761		CD N4	GAPDH	SYBR	31.2336
CD N5	COL6A3	SYBR	36.1197		CD N5	GAPDH	SYBR	30.8559
CD N9	COL6A3	SYBR	37.827		CD N9	GAPDH	SYBR	30.4646
H N2	COL6A3	SYBR	34.1493		H N2	GAPDH	SYBR	30.5392
H N3	COL6A3	SYBR	39.0009		H N3	GAPDH	SYBR	30.6788
H N7	COL6A3	SYBR	38.3606		H N7	GAPDH	SYBR	30.6409
H N9	COL6A3	SYBR	36.4517		H N9	GAPDH	SYBR	29.9815
H N10	COL6A3	SYBR	37.5306		H N10	GAPDH	SYBR	30.5135
G1	COL6A3	SYBR	30.9352		G1	GAPDH	SYBR	31.0679
G2	COL6A3	SYBR	34.0218		G2	GAPDH	SYBR	31.2588																		N	N	Y	N
G3	COL6A3	SYBR	34.3478		G3	GAPDH	SYBR	31.3335
G4	COL6A3	SYBR	32.4019		G4	GAPDH	SYBR	31.2373
G5	COL6A3	SYBR	34.4232		G5	GAPDH	SYBR	30.9119
G6	COL6A3	SYBR	32.6605		G6	GAPDH	SYBR	31.2803
G7	COL6A3	SYBR	32.8262		G7	GAPDH	SYBR	31.6346
G8	COL6A3	SYBR	33.3578		G8	GAPDH	SYBR	31.1502
G9	COL6A3	SYBR	33.7755		G9	GAPDH	SYBR	30.9354
G10	COL6A3	SYBR	34.8023		G10	GAPDH	SYBR	31.2561
G11	COL6A3	SYBR	33.917		G11	GAPDH	SYBR	31.1545
G12	COL6A3	SYBR	33.4974		G12	GAPDH	SYBR	31.1835
G13	COL6A3	SYBR	30.5437		G13	GAPDH	SYBR	30.0147
G14	COL6A3	SYBR	34.4388		G14	GAPDH	SYBR	30.8731
G15	COL6A3	SYBR	37.0099		G15	GAPDH	SYBR	31.2067
G16	COL6A3	SYBR	34.3284		G16	GAPDH	SYBR	31.1144
G17	COL6A3	SYBR	31.028		G17	GAPDH	SYBR	31.299
G18	COL6A3	SYBR	35.1217		G18	GAPDH	SYBR	31.0398
G19	COL6A3	SYBR	33.3313		G19	GAPDH	SYBR	33.2464
G20	COL6A3	SYBR	33.6345		G20	GAPDH	SYBR	31.019
G21	COL6A3	SYBR	33.814		G21	GAPDH	SYBR	31.1214
G22	COL6A3	SYBR	31.4862		G22	GAPDH	SYBR	34.8627
G23	COL6A3	SYBR	33.3705		G23	GAPDH	SYBR	31.2458
G24	COL6A3	SYBR	33.555		G24	GAPDH	SYBR	30.9266
G25	COL6A3	SYBR	33.4213		G25	GAPDH	SYBR	38.9763
G26	COL6A3	SYBR	35.0515		G26	GAPDH	SYBR	31.4726
G27	COL6A3	SYBR	33.5354		G27	GAPDH	SYBR	31.1829
G29	COL6A3	SYBR	32.0098		G29	GAPDH	SYBR	31.4794
G30	COL6A3	SYBR	32.0182		G30	GAPDH	SYBR	30.897
G31	COL6A3	SYBR	33.7999		G31	GAPDH	SYBR	31.6082
G32	COL6A3	SYBR	31.7579		G32	GAPDH	SYBR	31.7778
G34	COL6A3	SYBR	36.9671		G34	GAPDH	SYBR	31.0344
G36	COL6A3	SYBR	35.5549		G36	GAPDH	SYBR	30.6602
G39	COL6A3	SYBR	34.9413		G39	GAPDH	SYBR	34.4233
G41	COL6A3	SYBR	31.3338		G41	GAPDH	SYBR	30.5446
G42	COL6A3	SYBR	29.3846		G42	GAPDH	SYBR	29.7063																		N	N	N	N
G43	COL6A3	SYBR	36.6673		G43	GAPDH	SYBR	33.1435
G44	COL6A3	SYBR	35.3799		G44	GAPDH	SYBR	30.4184
G45	COL6A3	SYBR	34.0795		G45	GAPDH	SYBR	31.2202
G46	COL6A3	SYBR	32.6413		G46	GAPDH	SYBR	30.7129
G47	COL6A3	SYBR	36.5103		G47	GAPDH	SYBR	30.7446
G48	COL6A3	SYBR	34.8194		G48	GAPDH	SYBR	30.8143
G49	COL6A3	SYBR	33.3399		G49	GAPDH	SYBR	31.1597
G50	COL6A3	SYBR	32.5799		G50	GAPDH	SYBR	30.4275
G51	COL6A3	SYBR	37.0795		G51	GAPDH	SYBR	30.6303
G52	COL6A3	SYBR	35.2984		G52	GAPDH	SYBR	30.3983
G55	COL6A3	SYBR	34.5484		G55	GAPDH	SYBR	32.9769
G56	COL6A3	SYBR	34.4575		G56	GAPDH	SYBR	30.7371
G57	COL6A3	SYBR	39.8832		G57	GAPDH	SYBR	34.8766
G58	COL6A3	SYBR	33.0092		G58	GAPDH	SYBR	30.4559
G59	COL6A3	SYBR	33.135		G59	GAPDH	SYBR	30.4248
G60	COL6A3	SYBR	35.2779		G60	GAPDH	SYBR	30.3624
G61	COL6A3	SYBR	35.5075		G61	GAPDH	SYBR	30.3494
G62	COL6A3	SYBR	36.6213		G62	GAPDH	SYBR	30.6513
G63	COL6A3	SYBR	38.5257		G63	GAPDH	SYBR	32.8291
N/A
N1	COL6A3	SYBR			N1	GAPDH	SYBR	31.3758																		N	N	N	N
G54	COL6A3	SYBR			G54	GAPDH	SYBR	36.3307

## Sheet: SERPINH1
Sample Name	Target Name	Reporter	Ct Mean	sample		Target Name	Reporter	Ct Mean
N1	SERPINH1	SYBR	35.1324	N1		GAPDH	SYBR	31.3758
N2	SERPINH1	SYBR	34.9918	N2		GAPDH	SYBR	34.1196
N3	SERPINH1	SYBR	34.0618	N3		GAPDH	SYBR	33.5692
N4	SERPINH1	SYBR	33.8206	N4		GAPDH	SYBR	33.5563
N5	SERPINH1	SYBR	35.8106	N5		GAPDH	SYBR	34.2836
CD N1	SERPINH1	SYBR	34.8499	CD N1		GAPDH	SYBR	30.7737
CD N4	SERPINH1	SYBR	34.2379	CD N4		GAPDH	SYBR	31.2336
CD N5	SERPINH1	SYBR	33.4885	CD N5		GAPDH	SYBR	30.8559
CD N9	SERPINH1	SYBR	33.8964	CD N9		GAPDH	SYBR	30.4646
H N2	SERPINH1	SYBR	33.3206	H N2		GAPDH	SYBR	30.5392
H N3	SERPINH1	SYBR	32.4499	H N3		GAPDH	SYBR	30.6788
H N7	SERPINH1	SYBR	32.828	H N7		GAPDH	SYBR	30.6409
H N9	SERPINH1	SYBR	33.0918	H N9		GAPDH	SYBR	29.9815
H N10	SERPINH1	SYBR	32.4144	H N10		GAPDH	SYBR	30.5135
G1	SERPINH1	SYBR	31.8131	G1		GAPDH	SYBR	31.0679
G2	SERPINH1	SYBR	33.4944	G2		GAPDH	SYBR	31.2588
G3	SERPINH1	SYBR	32.663	G3		GAPDH	SYBR	31.3335
G4	SERPINH1	SYBR	33.5121	G4		GAPDH	SYBR	31.2373
G5	SERPINH1	SYBR	33.585	G5		GAPDH	SYBR	30.9119
G6	SERPINH1	SYBR	32.3641	G6		GAPDH	SYBR	31.2803
G7	SERPINH1	SYBR	32.65	G7		GAPDH	SYBR	31.6346
G8	SERPINH1	SYBR	32.2734	G8		GAPDH	SYBR	31.1502
G9	SERPINH1	SYBR	32.9465	G9		GAPDH	SYBR	30.9354
G10	SERPINH1	SYBR	33.2904	G10		GAPDH	SYBR	31.2561
G11	SERPINH1	SYBR	31.6156	G11		GAPDH	SYBR	31.1545
G12	SERPINH1	SYBR	34.1565	G12		GAPDH	SYBR	31.1835
G13	SERPINH1	SYBR	31.4198	G13		GAPDH	SYBR	30.0147
G14	SERPINH1	SYBR	32.4934	G14		GAPDH	SYBR	30.8731
G15	SERPINH1	SYBR	35.9422	G15		GAPDH	SYBR	31.2067
G16	SERPINH1	SYBR	33.5065	G16		GAPDH	SYBR	31.1144
G17	SERPINH1	SYBR	30.7832	G17		GAPDH	SYBR	31.299
G18	SERPINH1	SYBR	33.3636	G18		GAPDH	SYBR	31.0398
G19	SERPINH1	SYBR	33.4907	G19		GAPDH	SYBR	33.2464
G20	SERPINH1	SYBR	34.7977	G20		GAPDH	SYBR	31.019
G21	SERPINH1	SYBR	35.8176	G21		GAPDH	SYBR	31.1214
G22	SERPINH1	SYBR	33.8024	G22		GAPDH	SYBR	34.8627
G23	SERPINH1	SYBR	33.4239	G23		GAPDH	SYBR	31.2458
G24	SERPINH1	SYBR	34.0066	G24		GAPDH	SYBR	30.9266
G25	SERPINH1	SYBR	32.1133	G25		GAPDH	SYBR	38.9763
G26	SERPINH1	SYBR	32.1385	G26		GAPDH	SYBR	31.4726
G27	SERPINH1	SYBR	32.8052	G27		GAPDH	SYBR	31.1829
G29	SERPINH1	SYBR	33.704	G29		GAPDH	SYBR	31.4794
G30	SERPINH1	SYBR	32.3871	G30		GAPDH	SYBR	30.897
G31	SERPINH1	SYBR	33.9445	G31		GAPDH	SYBR	31.6082
G32	SERPINH1	SYBR	32.005	G32		GAPDH	SYBR	31.7778
G34	SERPINH1	SYBR	33.8543	G34		GAPDH	SYBR	31.0344
G36	SERPINH1	SYBR	33.4023	G36		GAPDH	SYBR	30.6602
G39	SERPINH1	SYBR	32.566	G39		GAPDH	SYBR	34.4233
G41	SERPINH1	SYBR	31.4523	G41		GAPDH	SYBR	30.5446
G42	SERPINH1	SYBR	32.1776	G42		GAPDH	SYBR	29.7063
G43	SERPINH1	SYBR	32.7288	G43		GAPDH	SYBR	33.1435
G44	SERPINH1	SYBR	31.4617	G44		GAPDH	SYBR	30.4184
G45	SERPINH1	SYBR	32.4953	G45		GAPDH	SYBR	31.2202
G46	SERPINH1	SYBR	31.8053	G46		GAPDH	SYBR	30.7129
G47	SERPINH1	SYBR	33.3936	G47		GAPDH	SYBR	30.7446
G48	SERPINH1	SYBR	32.2791	G48		GAPDH	SYBR	30.8143
G49	SERPINH1	SYBR	31.6863	G49		GAPDH	SYBR	31.1597
G50	SERPINH1	SYBR	30.7047	G50		GAPDH	SYBR	30.4275
G51	SERPINH1	SYBR	32.0483	G51		GAPDH	SYBR	30.6303
G52	SERPINH1	SYBR	31.272	G52		GAPDH	SYBR	30.3983
G54	SERPINH1	SYBR	33.2805	G54		GAPDH	SYBR	36.3307
G55	SERPINH1	SYBR	32.1194	G55		GAPDH	SYBR	32.9769
G56	SERPINH1	SYBR	29.1099	G56		GAPDH	SYBR	30.7371
G57	SERPINH1	SYBR	33.6547	G57		GAPDH	SYBR	34.8766
G58	SERPINH1	SYBR	31.7806	G58		GAPDH	SYBR	30.4559
G59	SERPINH1	SYBR	30.9844	G59		GAPDH	SYBR	30.4248
G60	SERPINH1	SYBR	31.7795	G60		GAPDH	SYBR	30.3624
G61	SERPINH1	SYBR	33.0043	G61		GAPDH	SYBR	30.3494
G62	SERPINH1	SYBR	32.5752	G62		GAPDH	SYBR	30.6513
G63	SERPINH1	SYBR	31.7524	G63		GAPDH	SYBR	32.8291

## Sheet: PLEKHG1
Sample Name	Target Name	Reporter	Ct Mean		sample	Target Name	Reporter	Ct Mean
N2	PLEK	SYBR	37.4793		N2	GAPDH	SYBR	34.1196
CD N4	PLEK	SYBR	39.01		CD N4	GAPDH	SYBR	31.2336
CD N5	PLEK	SYBR	34.5885		CD N5	GAPDH	SYBR	30.8559
CD N9	PLEK	SYBR	34.8872		CD N9	GAPDH	SYBR	30.4646
H N2	PLEK	SYBR	33.9793		H N2	GAPDH	SYBR	30.5392
H N9	PLEK	SYBR	38.528		H N9	GAPDH	SYBR	29.9815
G1	PLEK	SYBR	31.5524		G1	GAPDH	SYBR	31.0679
G3	PLEK	SYBR	35.9767		G3	GAPDH	SYBR	31.3335
G4	PLEK	SYBR	33.2925		G4	GAPDH	SYBR	31.2373
G5	PLEK	SYBR	34.6879		G5	GAPDH	SYBR	30.9119
G6	PLEK	SYBR	32.995		G6	GAPDH	SYBR	31.2803
G7	PLEK	SYBR	33.9746		G7	GAPDH	SYBR	31.6346
G8	PLEK	SYBR	32.6097		G8	GAPDH	SYBR	31.1502
G9	PLEK	SYBR	34.8376		G9	GAPDH	SYBR	30.9354
G11	PLEK	SYBR	33.57		G11	GAPDH	SYBR	31.1545
G12	PLEK	SYBR	39.5859		G12	GAPDH	SYBR	31.1835
G13	PLEK	SYBR	29.7355		G13	GAPDH	SYBR	30.0147
G14	PLEK	SYBR	33.6295		G14	GAPDH	SYBR	30.8731
G16	PLEK	SYBR	34.4162		G16	GAPDH	SYBR	31.1144
G17	PLEK	SYBR	33.935		G17	GAPDH	SYBR	31.299
G18	PLEK	SYBR	35.2835		G18	GAPDH	SYBR	31.0398
G19	PLEK	SYBR	33.9619		G19	GAPDH	SYBR	33.2464
G20	PLEK	SYBR	33.4629		G20	GAPDH	SYBR	31.019
G21	PLEK	SYBR	35.8698		G21	GAPDH	SYBR	31.1214
G22	PLEK	SYBR	36.4354		G22	GAPDH	SYBR	34.8627
G23	PLEK	SYBR	34.2246		G23	GAPDH	SYBR	31.2458
G25	PLEK	SYBR	32.0759		G25	GAPDH	SYBR	38.9763
G27	PLEK	SYBR	35.0564		G27	GAPDH	SYBR	31.1829
G29	PLEK	SYBR	32.8595		G29	GAPDH	SYBR	31.4794
G30	PLEK	SYBR	32.4725		G30	GAPDH	SYBR	30.897
G32	PLEK	SYBR	33.5249		G32	GAPDH	SYBR	31.7778
G36	PLEK	SYBR	34.5889		G36	GAPDH	SYBR	30.6602
G39	PLEK	SYBR	38.1465		G39	GAPDH	SYBR	34.4233
G41	PLEK	SYBR	33.438		G41	GAPDH	SYBR	30.5446
G42	PLEKHG1	SYBR	29.6326		G42	GAPDH	SYBR	29.7063
G45	PLEK	SYBR	33.2012		G45	GAPDH	SYBR	31.2202
G46	PLEK	SYBR	33.8932		G46	GAPDH	SYBR	30.7129
G48	PLEK	SYBR	33.7128		G48	GAPDH	SYBR	30.8143
G49	PLEK	SYBR	34.3818		G49	GAPDH	SYBR	31.1597
G50	PLEK	SYBR	33.5313		G50	GAPDH	SYBR	30.4275
G51	PLEK	SYBR	35.4133		G51	GAPDH	SYBR	30.6303
G52	PLEK	SYBR	33.7924		G52	GAPDH	SYBR	30.3983
G55	PLEK	SYBR	33.9881		G55	GAPDH	SYBR	32.9769
G56	PLEK	SYBR	34.6721		G56	GAPDH	SYBR	30.7371
G58	PLEK	SYBR	33.4432		G58	GAPDH	SYBR	30.4559
G59	PLEK	SYBR	34.8		G59	GAPDH	SYBR	30.4248
G60	PLEK	SYBR	29.0716		G60	GAPDH	SYBR	30.3624
N/A
N1	PLEKHG1	SYBR			N1	GAPDH	SYBR	31.3758
N3	PLEK	SYBR			N3	GAPDH	SYBR	33.5692
N4	PLEK	SYBR			N4	GAPDH	SYBR	33.5563
N5	PLEK	SYBR			N5	GAPDH	SYBR	34.2836
CD N1	PLEKHG1	SYBR			CD N1	GAPDH	SYBR	30.7737
H N3	PLEK	SYBR			H N3	GAPDH	SYBR	30.6788
H N7	PLEK	SYBR			H N7	GAPDH	SYBR	30.6409
H N10	PLEK	SYBR			H N10	GAPDH	SYBR	30.5135
G2	PLEKHG1	SYBR			G2	GAPDH	SYBR	31.2588
G10	PLEK	SYBR			G10	GAPDH	SYBR	31.2561
G15	PLEK	SYBR			G15	GAPDH	SYBR	31.2067
G24	PLEK	SYBR			G24	GAPDH	SYBR	30.9266
G26	PLEK	SYBR			G26	GAPDH	SYBR	31.4726
G31	PLEK	SYBR			G31	GAPDH	SYBR	31.6082
G34	PLEK	SYBR			G34	GAPDH	SYBR	31.0344
G43	PLEK	SYBR			G43	GAPDH	SYBR	33.1435
G44	PLEK	SYBR			G44	GAPDH	SYBR	30.4184
G47	PLEK	SYBR			G47	GAPDH	SYBR	30.7446
G54	PLEK	SYBR			G54	GAPDH	SYBR	36.3307
G57	PLEK	SYBR			G57	GAPDH	SYBR	34.8766
G61	PLEK	SYBR			G61	GAPDH	SYBR	30.3494
G62	PLEK	SYBR			G62	GAPDH	SYBR	30.6513
G63	PLEK	SYBR			G63	GAPDH	SYBR	32.8291

## Sheet: KCNE2
Sample Name	Target Name	Reporter	Ct Mean		sample	Target Name	Reporter	Ct Mean
N1	KCNE2	SYBR	39.9509		N1	GAPDH	SYBR	31.3758																			Y	Y	N	Y
N2	KCNE2	SYBR	37.8495		N2	GAPDH	SYBR	34.1196
N3	KCNE2	SYBR	35.7862		N3	GAPDH	SYBR	33.5692
N4	KCNE2	SYBR	35.6927		N4	GAPDH	SYBR	33.5563
N5	KCNE2	SYBR	31.8866		N5	GAPDH	SYBR	34.2836
CD N4	KCNE2	SYBR	36.4005		CD N4	GAPDH	SYBR	31.2336
CD N5	KCNE2	SYBR	37.1137		CD N5	GAPDH	SYBR	30.8559
CD N9	KCNE2	SYBR	35.4055		CD N9	GAPDH	SYBR	30.4646
H N2	KCNE2	SYBR	36.0136		H N2	GAPDH	SYBR	30.5392
H N3	KCNE2	SYBR	33.8054		H N3	GAPDH	SYBR	30.6788
H N7	KCNE2	SYBR	34.841		H N7	GAPDH	SYBR	30.6409
H N9	KCNE2	SYBR	34.7935		H N9	GAPDH	SYBR	29.9815
H N10	KCNE2	SYBR	34.6892		H N10	GAPDH	SYBR	30.5135
G1	KCNE2	SYBR	32.4162		G1	GAPDH	SYBR	31.0679
G2	KCNE2	SYBR	36.5914		G2	GAPDH	SYBR	31.2588																			Y	Y	N	N
G3	KCNE2	SYBR	34.3153		G3	GAPDH	SYBR	31.3335
G4	KCNE2	SYBR	34.4368		G4	GAPDH	SYBR	31.2373
G5	KCNE2	SYBR	34.6393		G5	GAPDH	SYBR	30.9119
G6	KCNE2	SYBR	31.6348		G6	GAPDH	SYBR	31.2803
G7	KCNE2	SYBR	35.0338		G7	GAPDH	SYBR	31.6346
G8	KCNE2	SYBR	34.9009		G8	GAPDH	SYBR	31.1502
G9	KCNE2	SYBR	33.8339		G9	GAPDH	SYBR	30.9354
G10	KCNE2	SYBR	33.4303		G10	GAPDH	SYBR	31.2561
G11	KCNE2	SYBR	33.9213		G11	GAPDH	SYBR	31.1545
G12	KCNE2	SYBR	36.4812		G12	GAPDH	SYBR	31.1835
G13	KCNE2	SYBR	30.0249		G13	GAPDH	SYBR	30.0147
G14	KCNE2	SYBR	35.8399		G14	GAPDH	SYBR	30.8731
G15	KCNE2	SYBR	35.9398		G15	GAPDH	SYBR	31.2067
G16	KCNE2	SYBR	35.5627		G16	GAPDH	SYBR	31.1144
G17	KCNE2	SYBR	32.8838		G17	GAPDH	SYBR	31.299
G18	KCNE2	SYBR	34.8399		G18	GAPDH	SYBR	31.0398
G19	KCNE2	SYBR	31.9173		G19	GAPDH	SYBR	33.2464
G20	KCNE2	SYBR	34.8107		G20	GAPDH	SYBR	31.019
G21	KCNE2	SYBR	33.8888		G21	GAPDH	SYBR	31.1214
G22	KCNE2	SYBR	30.8828		G22	GAPDH	SYBR	34.8627
G23	KCNE2	SYBR	37.07		G23	GAPDH	SYBR	31.2458
G24	KCNE2	SYBR	33.2383		G24	GAPDH	SYBR	30.9266
G25	KCNE2	SYBR	32.1321		G25	GAPDH	SYBR	38.9763
G26	KCNE2	SYBR	35.8106		G26	GAPDH	SYBR	31.4726
G27	KCNE2	SYBR	34.2285		G27	GAPDH	SYBR	31.1829
G29	KCNE2	SYBR	33.4963		G29	GAPDH	SYBR	31.4794
G30	KCNE2	SYBR	33.4948		G30	GAPDH	SYBR	30.897
G31	KCNE2	SYBR	35.6385		G31	GAPDH	SYBR	31.6082
G32	KCNE2	SYBR	31.7732		G32	GAPDH	SYBR	31.7778
G34	KCNE2	SYBR	35.4767		G34	GAPDH	SYBR	31.0344
G36	KCNE2	SYBR	35.6097		G36	GAPDH	SYBR	30.6602
G39	KCNE2	SYBR	33.5815		G39	GAPDH	SYBR	34.4233
G41	KCNE2	SYBR	31.6203		G41	GAPDH	SYBR	30.5446
G42	KCNE2	SYBR	30.4884		G42	GAPDH	SYBR	29.7063																			N	N	N	N
G43	KCNE2	SYBR	36.7264		G43	GAPDH	SYBR	33.1435
G44	KCNE2	SYBR	34.9133		G44	GAPDH	SYBR	30.4184
G45	KCNE2	SYBR	35.2691		G45	GAPDH	SYBR	31.2202
G46	KCNE2	SYBR	35.762		G46	GAPDH	SYBR	30.7129
G47	KCNE2	SYBR	33.9241		G47	GAPDH	SYBR	30.7446
G48	KCNE2	SYBR	36.7177		G48	GAPDH	SYBR	30.8143
G49	KCNE2	SYBR	35.3658		G49	GAPDH	SYBR	31.1597
G50	KCNE2	SYBR	36.8868		G50	GAPDH	SYBR	30.4275
G51	KCNE2	SYBR	34.6996		G51	GAPDH	SYBR	30.6303
G52	KCNE2	SYBR	34.3644		G52	GAPDH	SYBR	30.3983
G54	KCNE2	SYBR	36.2774		G54	GAPDH	SYBR	36.3307
G55	KCNE2	SYBR	34.4199		G55	GAPDH	SYBR	32.9769
G56	KCNE2	SYBR	34.5193		G56	GAPDH	SYBR	30.7371
G58	KCNE2	SYBR	33.9111		G58	GAPDH	SYBR	30.4559
G59	KCNE2	SYBR	36.5766		G59	GAPDH	SYBR	30.4248
G60	KCNE2	SYBR	36.9963		G60	GAPDH	SYBR	30.3624
G61	KCNE2	SYBR	34.4306		G61	GAPDH	SYBR	30.3494
G62	KCNE2	SYBR	37.5415		G62	GAPDH	SYBR	30.6513
G63	KCNE2	SYBR	34.2477		G63	GAPDH	SYBR	32.8291
N/A
CD N1	KCNE2	SYBR			CD N1	GAPDH	SYBR	30.7737																			Y	N	N	N
G57	KCNE2	SYBR			G57	GAPDH	SYBR	34.8766

## Sheet: GIF
Sample Name	Target Name	Reporter	Ct Mean		Sample Name	Target Name	Reporter	Ct Mean
N1	GIF	SYBR	28.9561		N1	GAPDH	SYBR	31.3758
N2	GIF	SYBR	29.463		N2	GAPDH	SYBR	34.1196
N3	GIF	SYBR	29.7155		N3	GAPDH	SYBR	33.5692
N4	GIF	SYBR	30.0869		N4	GAPDH	SYBR	33.5563
N5	GIF	SYBR	30.0001		N5	GAPDH	SYBR	34.2836
CD N1	GIF	SYBR	29.0275		CD N1	GAPDH	SYBR	30.7737
CD N4	GIF	SYBR	29.0237		CD N4	GAPDH	SYBR	31.2336
CD N5	GIF	SYBR	29.179		CD N5	GAPDH	SYBR	30.8559
CD N9	GIF	SYBR	29.1482		CD N9	GAPDH	SYBR	30.4646
H N2	GIF	SYBR	29.115		H N2	GAPDH	SYBR	30.5392
H N3	GIF	SYBR	27.7806		H N3	GAPDH	SYBR	30.6788
H N7	GIF	SYBR	27.7262		H N7	GAPDH	SYBR	30.6409
H N9	GIF	SYBR	27.764		H N9	GAPDH	SYBR	29.9815
H N10	GIF	SYBR	27.7521		H N10	GAPDH	SYBR	30.5135
G1	GIF	SYBR	28.7348		G1	GAPDH	SYBR	31.0679
G2	GIF	SYBR	28.9471		G2	GAPDH	SYBR	31.2588
G3	GIF	SYBR	29.1996		G3	GAPDH	SYBR	31.3335
G4	GIF	SYBR	29.0805		G4	GAPDH	SYBR	31.2373
G5	GIF	SYBR	28.9258		G5	GAPDH	SYBR	30.9119
G6	GIF	SYBR	29.031		G6	GAPDH	SYBR	31.2803
G7	GIF	SYBR	28.8682		G7	GAPDH	SYBR	31.6346
G8	GIF	SYBR	28.9322		G8	GAPDH	SYBR	31.1502
G9	GIF	SYBR	28.9257		G9	GAPDH	SYBR	30.9354
G10	GIF	SYBR	29.1209		G10	GAPDH	SYBR	31.2561
G11	GIF	SYBR	29.0467		G11	GAPDH	SYBR	31.1545
G12	GIF	SYBR	28.9937		G12	GAPDH	SYBR	31.1835
G13	GIF	SYBR	27.6456		G13	GAPDH	SYBR	30.0147
G14	GIF	SYBR	28.8723		G14	GAPDH	SYBR	30.8731
G15	GIF	SYBR	29.0505		G15	GAPDH	SYBR	31.2067
G16	GIF	SYBR	28.7523		G16	GAPDH	SYBR	31.1144
G17	GIF	SYBR	28.6066		G17	GAPDH	SYBR	31.299
G18	GIF	SYBR	28.8507		G18	GAPDH	SYBR	31.0398
G19	GIF	SYBR	28.9764		G19	GAPDH	SYBR	33.2464
G20	GIF	SYBR	28.7413		G20	GAPDH	SYBR	31.019
G21	GIF	SYBR	28.5985		G21	GAPDH	SYBR	31.1214
G22	GIF	SYBR	29.1616		G22	GAPDH	SYBR	34.8627
G23	GIF	SYBR	28.6476		G23	GAPDH	SYBR	31.2458
G24	GIF	SYBR	28.3438		G24	GAPDH	SYBR	30.9266
G25	GIF	SYBR	28.3769		G25	GAPDH	SYBR	38.9763
G26	GIF	SYBR	28.5586		G26	GAPDH	SYBR	31.4726
G27	GIF	SYBR	28.6407		G27	GAPDH	SYBR	31.1829
G29	GIF	SYBR	28.1794		G29	GAPDH	SYBR	31.4794
G30	GIF	SYBR	28.3513		G30	GAPDH	SYBR	30.897
G31	GIF	SYBR	28.5131		G31	GAPDH	SYBR	31.6082
G32	GIF	SYBR	28.3779		G32	GAPDH	SYBR	31.7778
G34	GIF	SYBR	28.7507		G34	GAPDH	SYBR	31.0344
G36	GIF	SYBR	27.737		G36	GAPDH	SYBR	30.6602
G39	GIF	SYBR	28.2465		G39	GAPDH	SYBR	34.4233
G41	GIF	SYBR	27.5854		G41	GAPDH	SYBR	30.5446
G42	GIF	SYBR	28.8177		G42	GAPDH	SYBR	29.7063
G43	GIF	SYBR	28.02		G43	GAPDH	SYBR	33.1435
G44	GIF	SYBR	27.7989		G44	GAPDH	SYBR	30.4184
G45	GIF	SYBR	27.8432		G45	GAPDH	SYBR	31.2202
G46	GIF	SYBR	27.762		G46	GAPDH	SYBR	30.7129
G47	GIF	SYBR	27.7579		G47	GAPDH	SYBR	30.7446
G48	GIF	SYBR	27.6525		G48	GAPDH	SYBR	30.8143
G49	GIF	SYBR	27.7696		G49	GAPDH	SYBR	31.1597
G50	GIF	SYBR	27.6441		G50	GAPDH	SYBR	30.4275
G51	GIF	SYBR	27.5881		G51	GAPDH	SYBR	30.6303
G52	GIF	SYBR	27.679		G52	GAPDH	SYBR	30.3983
G54	GIF	SYBR	28.2844		G54	GAPDH	SYBR	36.3307
G55	GIF	SYBR	27.8354		G55	GAPDH	SYBR	32.9769
G56	GIF	SYBR	27.8606		G56	GAPDH	SYBR	30.7371
G57	GIF	SYBR	28.099		G57	GAPDH	SYBR	34.8766
G58	GIF	SYBR	27.4375		G58	GAPDH	SYBR	30.4559
G59	GIF	SYBR	27.5364		G59	GAPDH	SYBR	30.4248
G60	GIF	SYBR	27.8128		G60	GAPDH	SYBR	30.3624
G61	GIF	SYBR	27.5874		G61	GAPDH	SYBR	30.3494
G62	GIF	SYBR	27.4844		G62	GAPDH	SYBR	30.6513
G63	GIF	SYBR	27.732		G63	GAPDH	SYBR	32.8291

## Sheet: PGA4 新
Sample Name	Target Name	Reporter	Ct Mean		Sample Name	Target Name	Reporter	Ct Mean
N1	PGA4	SYBR			N1	GAPDH	SYBR	31.3758
N2	PGA4	SYBR			N2	GAPDH	SYBR	34.1196
N3	PGA4	SYBR			N3	GAPDH	SYBR	33.5692
N4	PGA4	SYBR			N4	GAPDH	SYBR	33.5563
N5	PGA4	SYBR			N5	GAPDH	SYBR	34.2836
CD N1	PGA4	SYBR	39.1223
CD N4	PGA4	SYBR			CD N4	GAPDH	SYBR	31.2336
CD N5	PGA4	SYBR			CD N5	GAPDH	SYBR	30.8559
CD N9	PGA4	SYBR			CD N9	GAPDH	SYBR	30.4646
H N2	PGA4	SYBR			H N2	GAPDH	SYBR	30.5392
H N3	PGA4	SYBR			H N3	GAPDH	SYBR	30.6788
H N7	PGA4	SYBR			H N7	GAPDH	SYBR	30.6409
H N9	PGA4	SYBR	35.9228		H N9	GAPDH	SYBR	29.9815
H N10	PGA4	SYBR			H N10	GAPDH	SYBR	30.5135
G1	PGA4	SYBR	38.2228		G1	GAPDH	SYBR	31.0679
G2	PGA4	SYBR	38.3138		G2	GAPDH	SYBR	31.2588
G3	PGA4	SYBR	38.4682		G3	GAPDH	SYBR	31.3335
G4	PGA4	SYBR			G4	GAPDH	SYBR	31.2373
G5	PGA4	SYBR	34.4597		G5	GAPDH	SYBR	30.9119
G6	PGA4	SYBR	39.3293		G6	GAPDH	SYBR	31.2803
G7	PGA4	SYBR			G7	GAPDH	SYBR	31.6346
G8	PGA4	SYBR			G8	GAPDH	SYBR	31.1502
G9	PGA4	SYBR			G9	GAPDH	SYBR	30.9354
G10	PGA4	SYBR			G10	GAPDH	SYBR	31.2561
G11	PGA4	SYBR			G11	GAPDH	SYBR	31.1545
G12	PGA4	SYBR			G12	GAPDH	SYBR	31.1835
G13	PGA4	SYBR	36.5882		G13	GAPDH	SYBR	30.0147
G14	PGA4	SYBR	38.5015		G14	GAPDH	SYBR	30.8731
G15	PGA4	SYBR	37.4531		G15	GAPDH	SYBR	31.2067
G16	PGA4	SYBR			G16	GAPDH	SYBR	31.1144
G17	PGA4	SYBR			G17	GAPDH	SYBR	31.299
G18	PGA4	SYBR			G18	GAPDH	SYBR	31.0398
G19	PGA4	SYBR			G19	GAPDH	SYBR	33.2464
G20	PGA4	SYBR	36.9211		G20	GAPDH	SYBR	31.019
G21	PGA4	SYBR	38.4517		G21	GAPDH	SYBR	31.1214
G22	PGA4	SYBR			G22	GAPDH	SYBR	34.8627
G23	PGA4	SYBR			G23	GAPDH	SYBR	31.2458
G24	PGA4	SYBR			G24	GAPDH	SYBR	30.9266
G25	PGA4	SYBR			G25	GAPDH	SYBR	38.9763
G26	PGA4	SYBR	35.6426		G26	GAPDH	SYBR	31.4726
G27	PGA4	SYBR			G27	GAPDH	SYBR	31.1829
G29	PGA4	SYBR	35.0354		G29	GAPDH	SYBR	31.4794
G30	PGA4	SYBR	36.7792		G30	GAPDH	SYBR	30.897
G31	PGA4	SYBR	37.2429		G31	GAPDH	SYBR	31.6082
G32	PGA4	SYBR			G32	GAPDH	SYBR	31.7778
G34	PGA4	SYBR	35.845		G34	GAPDH	SYBR	31.0344
G36	PGA4	SYBR			G36	GAPDH	SYBR	30.6602
G39	PGA4	SYBR			G39	GAPDH	SYBR	34.4233
G41	PGA4	SYBR	34.6078		G41	GAPDH	SYBR	30.5446
G42	PGA4	SYBR			G42	GAPDH	SYBR	29.7063
G43	PGA4	SYBR	36.492		G43	GAPDH	SYBR	33.1435
G44	PGA4	SYBR	34.911		G44	GAPDH	SYBR	30.4184
G45	PGA4	SYBR	35.228		G45	GAPDH	SYBR	31.2202
G46	PGA4	SYBR	39.8232		G46	GAPDH	SYBR	30.7129
G47	PGA4	SYBR	39.5156		G47	GAPDH	SYBR	30.7446
G48	PGA4	SYBR			G48	GAPDH	SYBR	30.8143
G49	PGA4	SYBR	36.9374		G49	GAPDH	SYBR	31.1597
G50	PGA4	SYBR	35.8528		G50	GAPDH	SYBR	30.4275
G51	PGA4	SYBR			G51	GAPDH	SYBR	30.6303
G52	PGA4	SYBR	38.7784		G52	GAPDH	SYBR	30.3983
G54	PGA4	SYBR	36.1349		G54	GAPDH	SYBR	36.3307
G55	PGA4	SYBR	36.498		G55	GAPDH	SYBR	32.9769
G56	PGA4	SYBR	38.7123		G56	GAPDH	SYBR	30.7371
G57	PGA4	SYBR	36.8943		G57	GAPDH	SYBR	34.8766
G58	PGA4	SYBR			G58	GAPDH	SYBR	30.4559
G59	PGA4	SYBR	39.4781		G59	GAPDH	SYBR	30.4248
G60	PGA4	SYBR	36.8923		G60	GAPDH	SYBR	30.3624
G61	PGA4	SYBR	37.469		G61	GAPDH	SYBR	30.3494
G62	PGA4	SYBR	37.1407		G62	GAPDH	SYBR	30.6513
G63	PGA4	SYBR			G63	GAPDH	SYBR	32.8291
N/A
N1
G42
